# Supplementary material
Source: bioRxiv or medRxiv preprint supplement (https://www.biorxiv.org/highwire/filestream/63679/field_highwire_adjunct_files/2/209221-3.pdf)

Figure S3

A

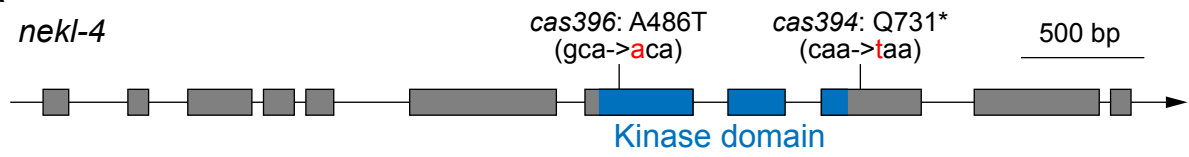

B

| Protein  | Sequence                                              |
|----------|-------------------------------------------------------|
| HsNEK6   | TVALK <b>*</b> KVQIFEMMD                              |
| HsNEK7   | PVALK <b>*</b> KVQIFDLMD                              |
| CeNEKL-3 | HVALK <b>*</b> KIQVFEMVD                              |
| HsNEK1   | QYV <b>*</b> IK <b>*</b> INISRMS-                     |
| HsNEK3   | MFAMKEIRL <b>*</b> PKSF-                              |
| HsNEK5   | HCV <b>*</b> IK <b>*</b> INFEKMP-                     |
| HsNEK10  | LLAMKEVNLHNP <b>*</b> AF                              |
| CeNEKL-4 | LLALKEIFMTN---                                        |
| HsNEK11  | LKVLKEISV <b>*</b> GELN-                              |
| HsNEK2   | ILVW <b>*</b> KELDYGSMT-                              |
| HsNEK4   | QYV <b>*</b> IK <b>*</b> KLNLRN <b>*</b> AS-          |
| HsNEK8   | LV <b>*</b> IK <b>*</b> Q <b>*</b> IP <b>*</b> VEQMT- |
| HsNEK9   | LVVW <b>*</b> KEVDLTRL <b>*</b> S-                    |
| CeNEKL-2 | KV <b>*</b> IK <b>*</b> LIN <b>*</b> THGMT-           |
| CeNEKL-1 | LV <b>*</b> IK <b>*</b> INMYD <b>*</b> LD-            |

C

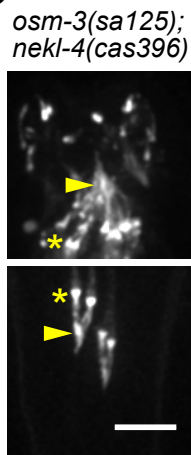

D

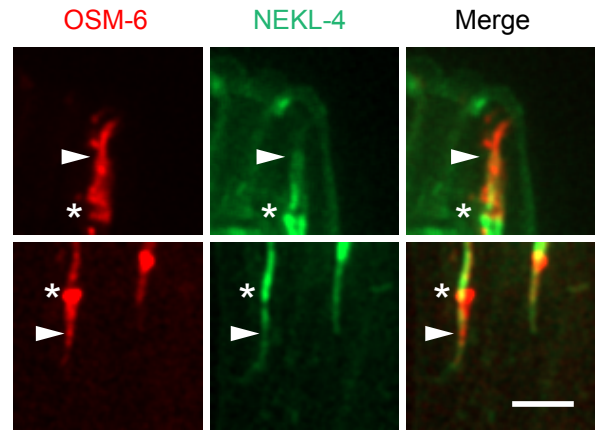

Supplement: Supplementary file [file 209221-3.pdf]
